# Supplementary material for: Probiotics Supplementation Attenuates Inflammation and Oxidative Stress Induced by Chronic Sleep Restriction
Source: MDPI journal article supplement (doi:10.3390/nu15061518), 2023-03-21
Supplement: s1 [file s1]

**Table S1.** List of used primary and secondary antibodies.

|                                                             | <b>Company</b> | <b>Code</b> | <b>Dilution</b> |
|-------------------------------------------------------------|----------------|-------------|-----------------|
| Anti-Nitrotyrosine antibody [EM-30]                         | AbCam          | ab125106    | 1:1000          |
| Anti-Dityrosine antibody [10A6]                             | AbCam          | ab243067    | 1:2000          |
| Anti-4 Hydroxynonenal antibody [12F7]                       | AbCam          | ab243070    | 1:2000          |
| Anti-Ogg1 antibody                                          | Santa Cruz B.  | Sc-376935   | 1:500           |
| 8-oxo-2'-deoxyguanosine (8oxodG)                            | Santa Cruz B.  | Sc-66036    | 1:500           |
| ionized calcium-binding adapter molecule 1 (Iba1)           | AbCam          | ab178846    | 1:2000          |
| ionized calcium-binding adapter molecule 1 (Iba1)           | Wako           | 019-19741   | 1:500           |
| Goat anti-Rabbit IgG (H+L) Alexa Fluor Plus 488             | Thermo Fisher  | A32731      | 1:600           |
| Recombinant Anti-IL-6 antibody [EPR23819-11]                | AbCam          | ab259341    | 1:1000          |
| Anti-IL-10 antibody                                         | AbCam          | ab9969      | 1:1000          |
| Recombinant Anti-TNF alpha antibody [EPR22598-212]          | AbCam          | ab255275    | 1:1000          |
| Recombinant Anti-IL-1 beta antibody [EPR23851-127]          | AbCam          | ab254360    | 1:1000          |
| Anti glyceraldehyde 3-phosphate dehydrogenase (GAPDH) (6C5) | Santa Cruz B.  | Sc-32233    | 1:500           |
| Goat Anti-Rabbit IgG H&L (HRP)                              | AbCam          | ab97051     | 1:5000          |
| Goat Anti-Mouse IgG H&L (HRP)                               | AbCam          | ab205719    | 1:3000          |
